# Supplementary material
Source: Elsevier journal article supplement (https://www.sciencedirect.com/science/article/pii/S1130239921000018)
Supplement: mmc1 [file S1130239921000018:mmc1.doc]

**Anexo A. Consentimiento informado**

Yo _____________________________ identificada con C.C No. ___________ expedida en la ciudad de ___________________ declaro a través de éste documento he sido invitado a participar en un estudio de investigación, cuyo objetivo es determinar la validez y confiabilidad del material pictográfico de comunicación de las Enfermeras Otuzoglu y Karaham, Versión en español. Mi participación en la investigación consiste en responder a sencillas preguntas. La información será recogida a través de la aplicación del material pictográfico de comunicación. La información obtenida será confidencial. Mi nombre no aparecerá en ningún documento, seré identificado con un código o un número consecutivo, y se respetarán mis respuestas a las preguntas que me realicen. Me han explicado que el proyecto solo tiene fines investigativos y que busca en un futuro mejorar la calidad del cuidado profesional en Enfermería. Por la participación no recibiré ningún beneficio y mi negación a participar tampoco me acarreará dificultades. Debido a la naturaleza de la investigación, no estaré sometido a ninguna clase de riesgo físico, que puede causar perjuicios a la salud y el bienestar. Durante el tiempo en que participe de la investigación, tengo libertad de negarme a contestar alguna pregunta que me cause incomodidad o puedo retirarme del estudio sin que afecte la prestación ninguna actividad de mi cotidianidad. Cuando no entienda una pregunta, tengo la posibilidad de solicitar aclaración y despejar dudas si surgen y de recibir orientación.

Por lo anterior de forma voluntaria acepto participar en el proyecto y en las entrevistas que se deriven de éste.

FIRMA:

DOCUMENTO DE IDENTIDAD:

FECHA:

Para aclarar dudas relacionadas con este estudio de investigación usted puede comunicarse con: Enfermera Yolima Manrique Anaya. Celular: XXXXXXXX Correo electrónico: [ymanriquea@unicartagena.edu.co](mailto:ymanriquea@unicartagena.edu.co)
